# Supplementary material for: Early intervention for preventing posttraumatic stress disorder: an Internet-based virtual reality treatment
Source: PubMed Central journal article supplement (PMC4385907; doi:10.3402/ejpt.v6.25608), 2015-04-02
Supplement: EJPT-6-25608-s003.pdf [file EJPT-6-25608-s003.pdf]

## **Early Intervention for Preventing Posttraumatic Stress Disorder: an Internet Based Virtual Reality Treatment**

Sara A Freedman, Ehud Dayan, Yael Bleich Kimelman, Heidi Weissman, Renana Eitan

Wczesna interwencja kryzysowa w zapobieganiu zaburzenia po stresie traumatycznym: terapia z wykorzystaniem rzeczywistości wirtualnej Wprowadzenie: Badania wykazały, że około 20% ludzi eksponowanych na traumę cierpi potem z powodu PTSD. Jednocześnie wielokrotnie wykazano skuteczność terapii poznawczo-behawioralnej w leczeniu chronicznego PTSD. Jednak skuteczność tego typu terapii w leczeniu pierwszej fazy PTSD nie jest do końca wysoka, stąd też coraz częściej wykorzystuje się nowe technologie w zapobieganiu PTSD zaraz po traumie. Cel: Celem tej pracy było opisanie skuteczności wczesnej interwencji kryzysowej opartej o podejście poznawczo-behawioralne wspomaganie użyciem rzeczywistości wirtualnej wśród zrandomizowanej próby kontrolnej (ang. randomized controlled trial) Method: Zbadano 200 osób po traumie wypadku motorowego w wieku 18-65 lat. Kontrolowano nasilenie objawów PTSD, obecność tendencji samobójczych oraz stanów psychotycznych. Dyskusja: Wyniki niniejszych badań mogą dostarczyć wglądu w efektywność wczesnych interwencji kryzysowej w zapobieganiu PTSD, w tym wykorzystanie nowych technologii wirtualnych.

Słowa kluczowe: Terapia oparta na rzeczywistości wirtualnej; terapia poznawczo-behawioralna; PTSD; wczesna interwencja kryzysowa

Name of translator: Marcin Rzesutek, University of Finance and Management in Warsaw, Poland

Citation: European Journal of Psychotraumatology 2015, 6: 25608 - <http://dx.doi.org/10.3402/ejpt.v6.25608>
